# Supplementary material
Source: MDPI journal article supplement (https://www.mdpi.com/2071-1050/12/5/1751)
Supplement: s1 [file s1]

Article

# Applying the Theory of Access to Food Security among Smallholder Family Farmers around North-West Mount Kenya

Emily Mutea <sup>1,3,\*</sup>, Stephan Rist <sup>1,2,3</sup> and Johanna Jacobi <sup>1,3</sup>

<sup>1</sup> Institute of Geography, University of Bern, 3012 Bern, Switzerland; stephan.Rist@giub.unibe.ch (S.R.); johanna.jacobi@cde.unibe.ch (J.J.)

<sup>2</sup> UNESCO Chair on Cultural and Natural Heritage and Sustainable Mountain Development, University of Bern, 3012 Bern, Switzerland

<sup>3</sup> Centre for Development and Environment, University of Bern, 3012 Bern, Switzerland

\* Correspondence: emily.mutea@cde.unibe.ch or emilymutea@gmail.com

Received: 31 January 2020; Accepted: 22 February 2020; Published: date

**Table S1.** Statistical significant levels at P = 0.05 threshold of the correlation coefficients between mechanisms of access to land and water.

| Mechanism of Access                       | Food Security Status | Formal Land Rights | Informal Land Rights | Access to Water | Access to Capital | Access to Technology | Access to Labour and Labour Opportunities | Access to Authority | Access to Market | Access to Knowledge | Access through Social Identity |
|-------------------------------------------|----------------------|--------------------|----------------------|-----------------|-------------------|----------------------|-------------------------------------------|---------------------|------------------|---------------------|--------------------------------|
| Food security status                      |                      |                    |                      |                 |                   |                      |                                           |                     |                  |                     |                                |
| Formal land rights                        | 0.20                 |                    |                      |                 |                   |                      |                                           |                     |                  |                     |                                |
| Informal land rights                      | 0.18                 | 0.17               |                      |                 |                   |                      |                                           |                     |                  |                     |                                |
| Access to water                           | 0.18                 | 0.17               | 0.16                 |                 |                   |                      |                                           |                     |                  |                     |                                |
| Access to capital                         | 0.22                 | 0.70               | 0.80                 | 0.03            |                   |                      |                                           |                     |                  |                     |                                |
| Access to technology                      | 0.00                 | 0.04               | 0.04                 | 0.01            | 0.04              |                      |                                           |                     |                  |                     |                                |
| Access to labour and labour opportunities | 0.62                 | 0.03               | 0.02                 | 0.76            | 0.12              | 0.59                 |                                           |                     |                  |                     |                                |
| Access to authority                       | 0.11                 | 0.46               | 0.43                 | 0.00            | 0.04              | 0.03                 | 0.86                                      |                     |                  |                     |                                |
| Access to market                          | 0.81                 | 0.39               | 0.35                 | 0.25            | 0.62              | 0.70                 | 0.63                                      | 0.07                |                  |                     |                                |
| Access to knowledge                       | 0.71                 | 0.38               | 0.44                 | 0.02            | 0.00              | 0.09                 | 0.25                                      | 0.17                | 0.32             |                     |                                |
| Access through social identity            | 0.48                 | 0.28               | 0.25                 | 0.12            | 0.00              | 0.30                 | 0.01                                      | 0.08                | 0.76             | 0.03                |                                |
| Access via social relations               | 0.12                 | 0.16               | 0.17                 | 0.16            | 0.28              | 0.05                 | 0.81                                      | 0.38                | 0.57             | 0.09                | 0.73                           |
